# Supplementary material for: Variation in wild pea (Pisum sativum subsp. elatius) seed dormancy and its relationship to the environment and seed coat traits
Source: PeerJ. 2019 Jan 14;7:e6263. doi: 10.7717/peerj.6263 (PMC6336014; doi:10.7717/peerj.6263)
Supplement: Table S4 — Moran’s I spatial correlation statistics (±SD) is for each distance class is reported. Coefficients in bold are significantly (P ≤ 0.05, Bonferroni correction) different from 0. [file peerj-07-6263-s010.xlsx]

## Sheet: List1
Variable	Distance class	Min Dist	Max Dist	# Pairs	I	SD(I)	P
AWCh1	Class 1	0	100	229	0.809983	0.0599662	0
	Class 2	100	200	176	0.66668	0.0710672	0
	Class 3	200	300	120	0.440766	0.0875066	2.52762e-07
	Class 4	300	600	674	0.162163	0.0324835	1.08153e-07
	Class 5	600	1035.75	1129	-0.00161792	0.0238874	0.712618
	Class 6	1035.75	1309.55	466	-0.447355	0.0414616	0
	Class 7	1309.55	1673.41	465	-0.425726	0.0397558	0
	Class 8	1673.41	2288.46	465	0.0166461	0.0376107	0.471803
	Class 9	2288.46	2918.87	466	-0.0799244	0.0374109	0.0631754
CECSOL	Class 1	0	100	229	0.156576	0.059398	0.00493243
	Class 2	100	200	176	0.0651777	0.0703346	0.282472
	Class 3	200	300	120	-0.0520548	0.0865821	0.630581
	Class 4	300	600	674	0.127413	0.0321937	1.85962e-05
	Class 5	600	1035.75	1129	0.066916	0.0236669	0.00108497
	Class 6	1035.75	1309.55	466	0.0175683	0.0410537	0.495449
	Class 7	1309.55	1673.41	465	-0.0477371	0.0394113	0.343666
	Class 8	1673.41	2288.46	465	0.0388932	0.0373471	0.18673
	Class 9	2288.46	2918.87	466	-0.09072	0.0371536	0.0306652
CRFVOL	Class 1	0	100	229	0.167966	0.0598742	0.00288931
	Class 2	100	200	176	-0.211552	0.0709486	0.00458342
	Class 3	200	300	120	-0.0328649	0.087357	0.797201
	Class 4	300	600	674	-0.0269671	0.0324366	0.609884
	Class 5	600	1035.75	1129	-0.0484484	0.0238517	0.110822
	Class 6	1035.75	1309.55	466	0.0363765	0.0413955	0.258311
	Class 7	1309.55	1673.41	465	0.0945298	0.0397	0.0082057
	Class 8	1673.41	2288.46	465	-0.0594506	0.037568	0.191823
	Class 9	2288.46	2918.87	466	0.0177536	0.0373692	0.450947
ORCDRC	Class 1	0	100	229	0.300792	0.0553741	1.91343e-08
	Class 2	100	200	176	0.362423	0.0651271	1.03863e-08
	Class 3	200	300	120	0.0951335	0.0800026	0.187058
	Class 4	300	600	674	0.0994586	0.0301461	0.000267711
	Class 5	600	1035.75	1129	-0.0868947	0.0221071	0.00054142
	Class 6	1035.75	1309.55	466	-0.296589	0.0381609	6.4837e-14
	Class 7	1309.55	1673.41	465	-0.0722676	0.03698	0.0944154
	Class 8	1673.41	2288.46	465	0.0323148	0.0354997	0.2287
	Class 9	2288.46	2918.87	466	0.0169487	0.0353513	0.438873
PHIKCL	Class 1	0	100	229	0.218935	0.0600566	0.000134083
	Class 2	100	200	176	0.0305829	0.0711837	0.564636
	Class 3	200	300	120	0.174817	0.0876537	0.03458
	Class 4	300	600	674	-0.00108862	0.0325297	0.7743
	Class 5	600	1035.75	1129	0.00809629	0.0239225	0.439006
	Class 6	1035.75	1309.55	466	-0.0545717	0.0415265	0.287647
	Class 7	1309.55	1673.41	465	-0.113536	0.0398107	0.00959068
	Class 8	1673.41	2288.46	465	-0.0625876	0.0376527	0.165875
	Class 9	2288.46	2918.87	466	0.0160313	0.037452	0.480074
SLTPPT	Class 1	0	100	229	0.406951	0.0597994	2.98228e-12
	Class 2	100	200	176	0.524378	0.0708522	4.44089e-14
	Class 3	200	300	120	0.396029	0.0872354	3.17822e-06
	Class 4	300	600	674	0.199803	0.0323985	8.70779e-11
	Class 5	600	1035.75	1129	0.0503547	0.0238227	0.0107419
	Class 6	1035.75	1309.55	466	-0.403602	0.0413419	0
	Class 7	1309.55	1673.41	465	-0.43899	0.0396547	0
	Class 8	1673.41	2288.46	465	-0.0438771	0.0375333	0.372668
	Class 9	2288.46	2918.87	466	0.0578463	0.0373353	0.0674931
SNDPPT	Class 1	0	100	229	0.196909	0.06007	0.000557797
	Class 2	100	200	176	0.156274	0.071201	0.0192255
	Class 3	200	300	120	0.205757	0.0876755	0.0136782
	Class 4	300	600	674	0.0884118	0.0325365	0.00238594
	Class 5	600	1035.75	1129	-0.000118948	0.0239277	0.666928
	Class 6	1035.75	1309.55	466	-0.170195	0.0415361	0.000119743
	Class 7	1309.55	1673.41	465	-0.11231	0.0398188	0.0104997
	Class 8	1673.41	2288.46	465	0.109466	0.037659	0.00145576
	Class 9	2288.46	2918.87	466	0.0638822	0.037458	0.0473089
TEXMHT	Class 1	0	100	229	0.707805	0.0604433	0
	Class 2	100	200	176	0.654712	0.0716819	0
	Class 3	200	300	120	0.390398	0.0882823	5.62682e-06
	Class 4	300	600	674	-0.0131527	0.032727	0.933374
	Class 5	600	1035.75	1129	-0.132646	0.0240726	3.82992e-07
	Class 6	1035.75	1309.55	466	-0.332922	0.0418039	1.22125e-14
	Class 7	1309.55	1673.41	465	-0.255423	0.0400453	9.49875e-10
	Class 8	1673.41	2288.46	465	0.27442	0.0378326	5.15143e-14
	Class 9	2288.46	2918.87	466	-0.0495966	0.0376276	0.297757
AWCtS	Class 1	0	100	229	0.506379	0.0589682	0
	Class 2	100	200	176	0.546172	0.06978	1.55431e-15
	Class 3	200	300	120	0.337829	0.0858821	5.01758e-05
	Class 4	300	600	674	0.216494	0.0319746	1.28741e-12
	Class 5	600	1035.75	1129	-0.0412323	0.0235002	0.189759
	Class 6	1035.75	1309.55	466	-0.446969	0.0407452	0
	Class 7	1309.55	1673.41	465	-0.404866	0.0391509	0
	Class 8	1673.41	2288.46	465	-0.0298929	0.0371481	0.60008
	Class 9	2288.46	2918.87	466	0.0611598	0.0369594	0.0527909
BIO17	Class 1	0	100	229	0.586638	0.059274	0
	Class 2	100	200	176	0.560956	0.0701746	4.44089e-16
	Class 3	200	300	120	0.324058	0.0863801	0.000107931
	Class 4	300	600	674	0.236603	0.0321305	1.5099e-14
	Class 5	600	1035.75	1129	0.0413091	0.0236188	0.0285224
	Class 6	1035.75	1309.55	466	-0.410335	0.0409647	0
	Class 7	1309.55	1673.41	465	-0.50819	0.0393361	0
	Class 8	1673.41	2288.46	465	0.0334979	0.0372896	0.238931
	Class 9	2288.46	2918.87	466	-0.133717	0.0370975	0.000888478
BIO15	Class 1	0	100	229	1.38277	0.0603289	0
	Class 2	100	200	176	1.02732	0.0715346	0
	Class 3	200	300	120	0.38791	0.0880964	6.14656e-06
	Class 4	300	600	674	0.264424	0.0326687	0
	Class 5	600	1035.75	1129	0.054077	0.0240282	0.00727298
	Class 6	1035.75	1309.55	466	-0.622689	0.0417218	0
	Class 7	1309.55	1673.41	465	-0.774774	0.0399759	0
	Class 8	1673.41	2288.46	465	-0.101562	0.0377794	0.0158404
	Class 9	2288.46	2918.87	466	-0.212686	0.0375756	7.34163e-08
BIO13	Class 1	0	100	229	0.665279	0.0600654	0
	Class 2	100	200	176	-0.0785658	0.071195	0.338457
	Class 3	200	300	120	-0.0385812	0.087668	0.748011
	Class 4	300	600	674	0.128276	0.0325342	2.01849e-05
	Class 5	600	1035.75	1129	0.015845	0.0239259	0.272368
	Class 6	1035.75	1309.55	466	-0.273559	0.0415328	2.37183e-10
	Class 7	1309.55	1673.41	465	-0.285224	0.039816	5.16187e-12
	Class 8	1673.41	2288.46	465	-0.0678157	0.0376568	0.127442
	Class 9	2288.46	2918.87	466	-0.0250597	0.0374559	0.695841
BIO12	Class 1	0	100	229	0.256798	0.0595997	7.35009e-06
	Class 2	100	200	176	0.147311	0.0705947	0.0254651
	Class 3	200	300	120	-0.0298475	0.0869104	0.823089
	Class 4	300	600	674	-0.182225	0.0322966	1.04152e-07
	Class 5	600	1035.75	1129	-0.0115633	0.0237452	0.961485
	Class 6	1035.75	1309.55	466	0.0485921	0.0411985	0.152057
	Class 7	1309.55	1673.41	465	-0.0336773	0.0395335	0.55628
	Class 8	1673.41	2288.46	465	0.0224	0.0374406	0.380758
	Class 9	2288.46	2918.87	466	-0.0230671	0.0372448	0.734115
BIO9	Class 1	0	100	229	0.489754	0.0592685	0
	Class 2	100	200	176	0.411176	0.0701676	1.8807e-09
	Class 3	200	300	120	0.397892	0.0863713	2.27728e-06
	Class 4	300	600	674	0.232346	0.0321277	4.17444e-14
	Class 5	600	1035.75	1129	-0.0762256	0.0236167	0.00532747
	Class 6	1035.75	1309.55	466	-0.401226	0.0409608	0
	Class 7	1309.55	1673.41	465	-0.463519	0.0393328	0
	Class 8	1673.41	2288.46	465	0.117609	0.0372871	0.000595921
	Class 9	2288.46	2918.87	466	0.0863899	0.037095	0.00906246
BIO8	Class 1	0	100	229	0.569399	0.060257	0
	Class 2	100	200	176	0.487168	0.0714419	3.30758e-12
	Class 3	200	300	120	0.307931	0.0879794	0.000296459
	Class 4	300	600	674	-0.065595	0.0326319	0.0908498
	Class 5	600	1035.75	1129	-0.136095	0.0240003	1.63945e-07
	Class 6	1035.75	1309.55	466	0.232349	0.0416702	5.69901e-09
	Class 7	1309.55	1673.41	465	-0.116431	0.0399322	0.00793436
	Class 8	1673.41	2288.46	465	-0.201331	0.0377459	4.2462e-07
	Class 9	2288.46	2918.87	466	-0.100926	0.0375429	0.015916
BIO7	Class 1	0	100	229	0.557645	0.0602577	0
	Class 2	100	200	176	0.634496	0.0714428	0
	Class 3	200	300	120	0.681477	0.0879806	3.77476e-15
	Class 4	300	600	674	0.230037	0.0326323	1.73639e-13
	Class 5	600	1035.75	1129	-0.155967	0.0240005	1.3288e-09
	Class 6	1035.75	1309.55	466	-0.0778432	0.0416707	0.105646
	Class 7	1309.55	1673.41	465	-0.0713761	0.0399327	0.126871
	Class 8	1673.41	2288.46	465	0.0130957	0.0377462	0.533346
	Class 9	2288.46	2918.87	466	-0.261768	0.0375432	2.16893e-11
BIO6	Class 1	0	100	229	0.852848	0.0603211	0
	Class 2	100	200	176	0.64434	0.0715245	0
	Class 3	200	300	120	0.528454	0.0880837	9.52969e-10
	Class 4	300	600	674	0.387306	0.0326647	0
	Class 5	600	1035.75	1129	-0.194536	0.0240252	1.82077e-14
	Class 6	1035.75	1309.55	466	-0.475944	0.0417162	0
	Class 7	1309.55	1673.41	465	-0.373918	0.0399712	0
	Class 8	1673.41	2288.46	465	0.226765	0.0377757	3.42951e-10
	Class 9	2288.46	2918.87	466	-0.122017	0.037572	0.00297522
BIO5	Class 1	0	100	229	0.46944	0.0600423	1.33227e-15
	Class 2	100	200	176	0.413194	0.0711653	2.65005e-09
	Class 3	200	300	120	0.364891	0.0876304	1.84642e-05
	Class 4	300	600	674	0.151444	0.0325224	6.4708e-07
	Class 5	600	1035.75	1129	-0.042912	0.0239169	0.17425
	Class 6	1035.75	1309.55	466	-0.360582	0.0415162	0
	Class 7	1309.55	1673.41	465	-0.290385	0.039802	2.01972e-12
	Class 8	1673.41	2288.46	465	-0.0470922	0.0376461	0.329948
	Class 9	2288.46	2918.87	466	0.0924758	0.0374455	0.00599985
BIO3	Class 1	0	100	229	1.03203	0.0602823	0
	Class 2	100	200	176	1.00243	0.0714745	0
	Class 3	200	300	120	0.730133	0.0880206	0
	Class 4	300	600	674	0.0455465	0.0326449	0.0864729
	Class 5	600	1035.75	1129	-0.0821919	0.0240101	0.0027956
	Class 6	1035.75	1309.55	466	-0.468658	0.0416884	0
	Class 7	1309.55	1673.41	465	-0.666415	0.0399476	0
	Class 8	1673.41	2288.46	465	0.0206952	0.0377577	0.409947
	Class 9	2288.46	2918.87	466	0.153606	0.0375544	1.25711e-05
BIO2	Class 1	0	100	229	0.295752	0.060167	3.61256e-07
	Class 2	100	200	176	-0.0198534	0.071326	0.894744
	Class 3	200	300	120	0.265805	0.0878332	0.0016619
	Class 4	300	600	674	0.0112981	0.032586	0.505167
	Class 5	600	1035.75	1129	0.141068	0.0239653	2.6103e-10
	Class 6	1035.75	1309.55	466	0.00268465	0.0416057	0.752843
	Class 7	1309.55	1673.41	465	-0.246672	0.0398777	3.14292e-09
	Class 8	1673.41	2288.46	465	-0.218338	0.0377041	3.50527e-08
	Class 9	2288.46	2918.87	466	-0.13022	0.0375021	0.00140053
BIO1	Class 1	0	100	229	0.946227	0.0602	0
	Class 2	100	200	176	0.684941	0.0713685	0
	Class 3	200	300	120	0.421076	0.0878868	9.13734e-07
	Class 4	300	600	674	0.348463	0.0326028	0
	Class 5	600	1035.75	1129	-0.15118	0.0239781	4.35916e-09
	Class 6	1035.75	1309.55	466	-0.662536	0.0416293	0
	Class 7	1309.55	1673.41	465	-0.520866	0.0398977	0
	Class 8	1673.41	2288.46	465	0.144464	0.0377194	4.0258e-05
	Class 9	2288.46	2918.87	466	0.0620072	0.037517	0.053554
