# Supplementary material for: Variation in wild pea (Pisum sativum subsp. elatius) seed dormancy and its relationship to the environment and seed coat traits
Source: PeerJ. 2019 Jan 14;7:e6263. doi: 10.7717/peerj.6263 (PMC6336014; doi:10.7717/peerj.6263)
Supplement: Table S5 — Scores of accessions along the first ordination axis were considered to be an indicator of the germination response of these accessions to experimental germination treatments (‘germination responsivity’). [file peerj-07-6263-s011.xlsx]

## Sheet: List1
Variable 1	Variable 2	Correlation	Conventional P	Dutilleul corrected P
PCA1	AWCh1	0.0212	0.83673	0.89949
PCA1	CECSOL	0.03484	0.73473	0.74385
PCA1	CRFVOL	0.00224	0.9826	0.98362
PCA1	ORCDRC	0.11226	0.27361	0.41331
PCA1	PHIKCL	0.00175	0.98641	0.98829
PCA1	SLTPPT	0.23576	0.02009	0.08808
PCA1	SNDPPT	-0.13945	0.1731	0.2455
PCA1	TEXMHT	-0.02372	0.81762	0.89016
PCA1	AWCtS	0.05388	0.60014	0.71349
PCA1	BIO17	0.04473	0.66353	0.75911
PCA1	BIO15	-0.13052	0.20255	0.50846
PCA1	BIO13	-0.0265	0.79664	0.84686
PCA1	BIO12	0.13029	0.20339	0.34512
PCA1	BIO9	0.00185	0.98563	0.98926
PCA1	BIO8	-0.25879	0.01048	0.08592
PCA1	BIO7	0.2851	0.00465	0.04069
PCA1	BIO6	-0.24671	0.01485	0.10757
PCA1	BIO5	0.02791	0.78614	0.84648
PCA1	BIO3	-0.18789	0.06533	0.32699
PCA1	BIO2	0.14032	0.17041	0.22099
PCA1	BIO1	-0.16337	0.10983	0.33038
PCA2	AWCh1	0.06407	0.53294	0.60077
PCA2	CECSOL	0.07644	0.45677	0.47517
PCA2	CRFVOL	0.21913	0.03104	0.04939
PCA2	ORCDRC	-0.07768	0.44947	0.50527
PCA2	PHIKCL	0.09351	0.36228	0.37675
PCA2	SLTPPT	0.10469	0.3075	0.3261
PCA2	SNDPPT	0.00375	0.97095	0.97211
PCA2	TEXMHT	0.06183	0.54744	0.6195
PCA2	AWCtS	0.03175	0.7575	0.78641
PCA2	BIO17	-0.02604	0.80016	0.82499
PCA2	BIO15	-0.13325	0.19321	0.32774
PCA2	BIO13	-0.1438	0.15997	0.26241
PCA2	BIO12	-0.0814	0.428	0.44461
PCA2	BIO9	-0.07779	0.44884	0.51507
PCA2	BIO8	-0.23016	0.02333	0.04244
PCA2	BIO7	0.3013	0.00271	0.01062
PCA2	BIO6	-0.34957	0.00045	0.00924
PCA2	BIO5	-0.11051	0.2812	0.33455
PCA2	BIO3	-0.20548	0.04348	0.0854
PCA2	BIO2	0.10478	0.30708	0.29247
PCA2	BIO1	-0.28428	0.00477	0.03593
