# Supplementary material for: Variation in wild pea (Pisum sativum subsp. elatius) seed dormancy and its relationship to the environment and seed coat traits
Source: PeerJ. 2019 Jan 14;7:e6263. doi: 10.7717/peerj.6263 (PMC6336014; doi:10.7717/peerj.6263)
Supplement: Table S6 — Degrees of freedom (df), test statistics (F), P value and adjusted coefficient of determination (R2) values are given for each variable. The significances were tested using a Monte Carlo permutation test with 999 permutations. [file peerj-07-6263-s012.xlsx]

## Sheet: List1
Variables	Shared effects					Pure effects
	df	Adjusted R2	F	P		df	Adjusted R2	F	P
(a)
All variables	10	0.136	2.5	0.004		10	-	-	-
Soil variables	9	0.049	1.55	0.1		9	0.053	1.649	0.103
PCNM variable	1	0.084	9.79	0.001		1	0.087	9.81	0.001
(b)
All variables	11	0.158	2.6	0.004		11	-	-	-
Bioclimatic variables	10	0.072	1.68	0.078		10	0.089	1.94	0.021
PCNM variable	1	0.084	9.79	0.003		1	0.102	11.45	0.002
(c)
All variables	2	0.131	8.3	0.002		2	-	-	-
BIO7	1	0.067	7.41	0.003		1	0.047	6.18	0.006
PCNM variable	1	0.084	9.79	0.001		1	0.064	8.021	0.005
